# Supplementary figures and images for: Monocyte Reconstitution and Gut Microbiota Composition after Hematopoietic Stem Cell Transplantation
Source: PubMed Central journal article supplement — Clin Hematol Int. 2020 Nov 23;2(4):156–64. doi: 10.2991/chi.k.201108.002 (PMC8432405; doi:10.2991/chi.k.201108.002), 2020-11-23

Supplemental Figure 2

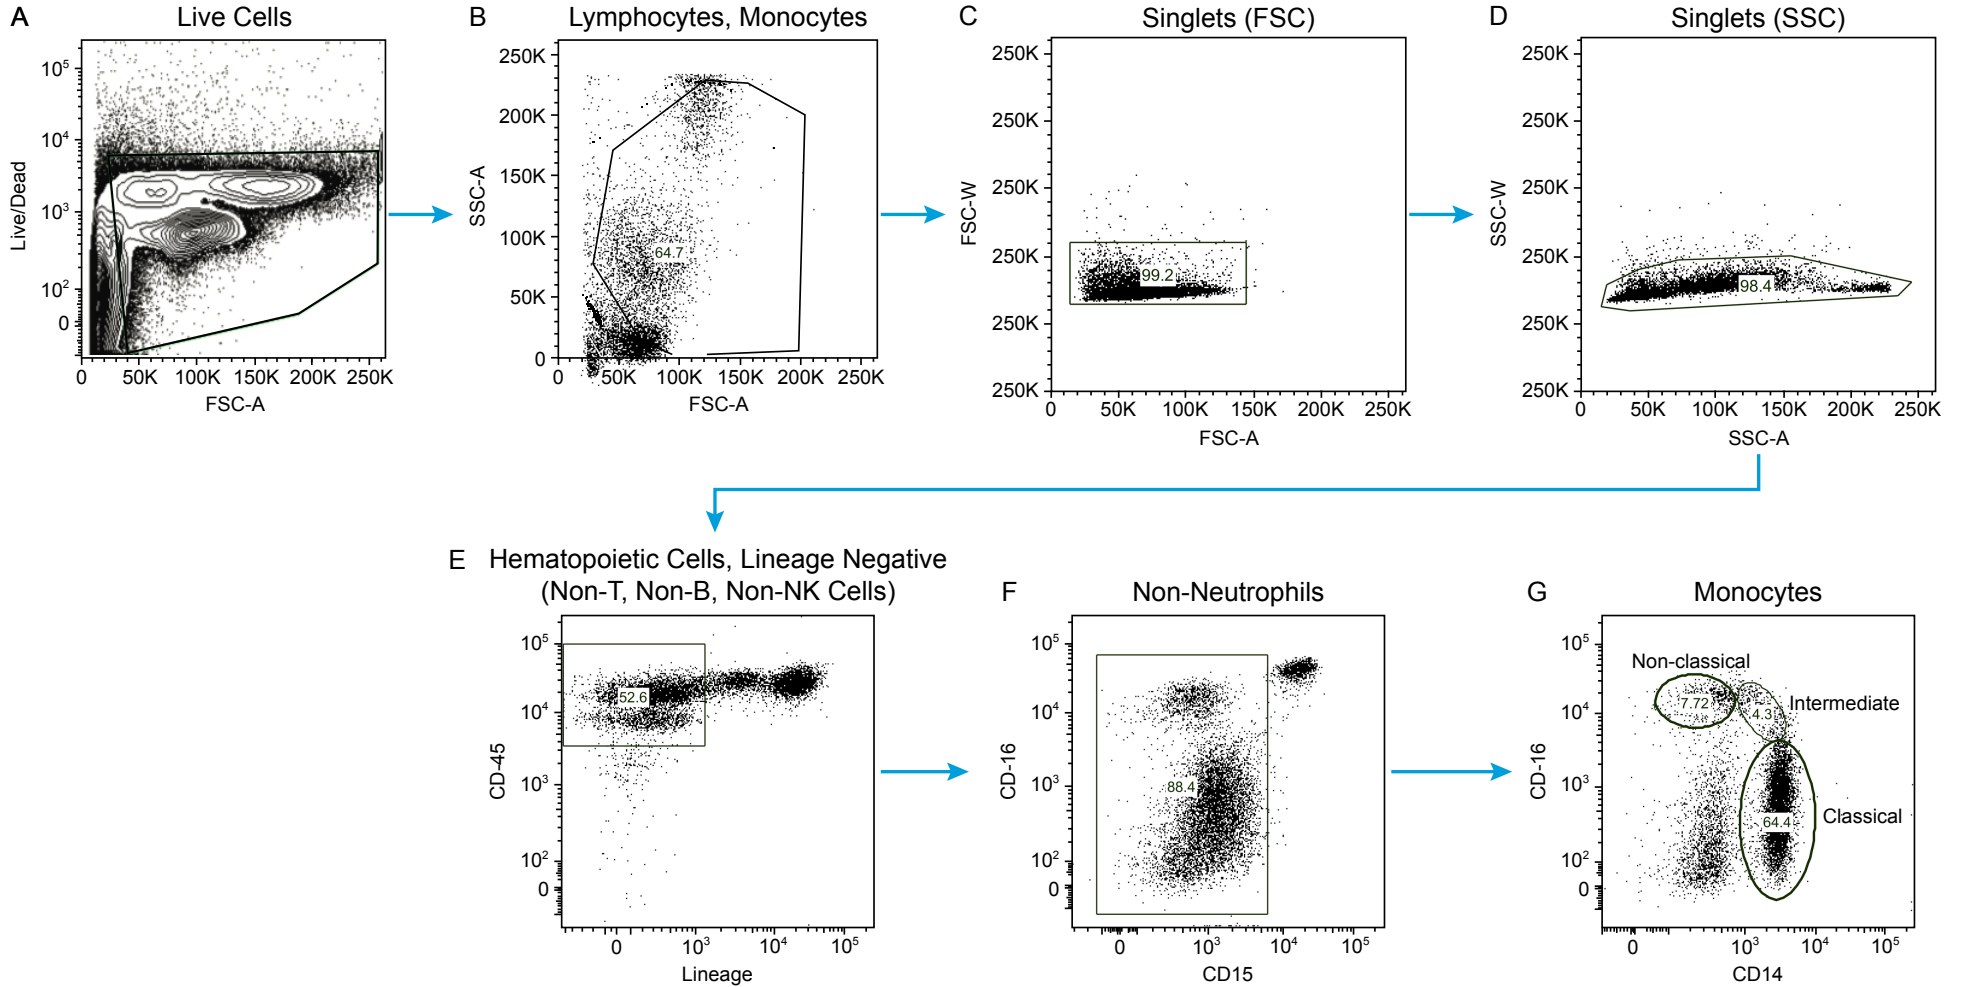

Supplement: CHI-2-4-156-s002.pdf [file CHI-2-4-156-s002.pdf]

Supplemental Figure 4

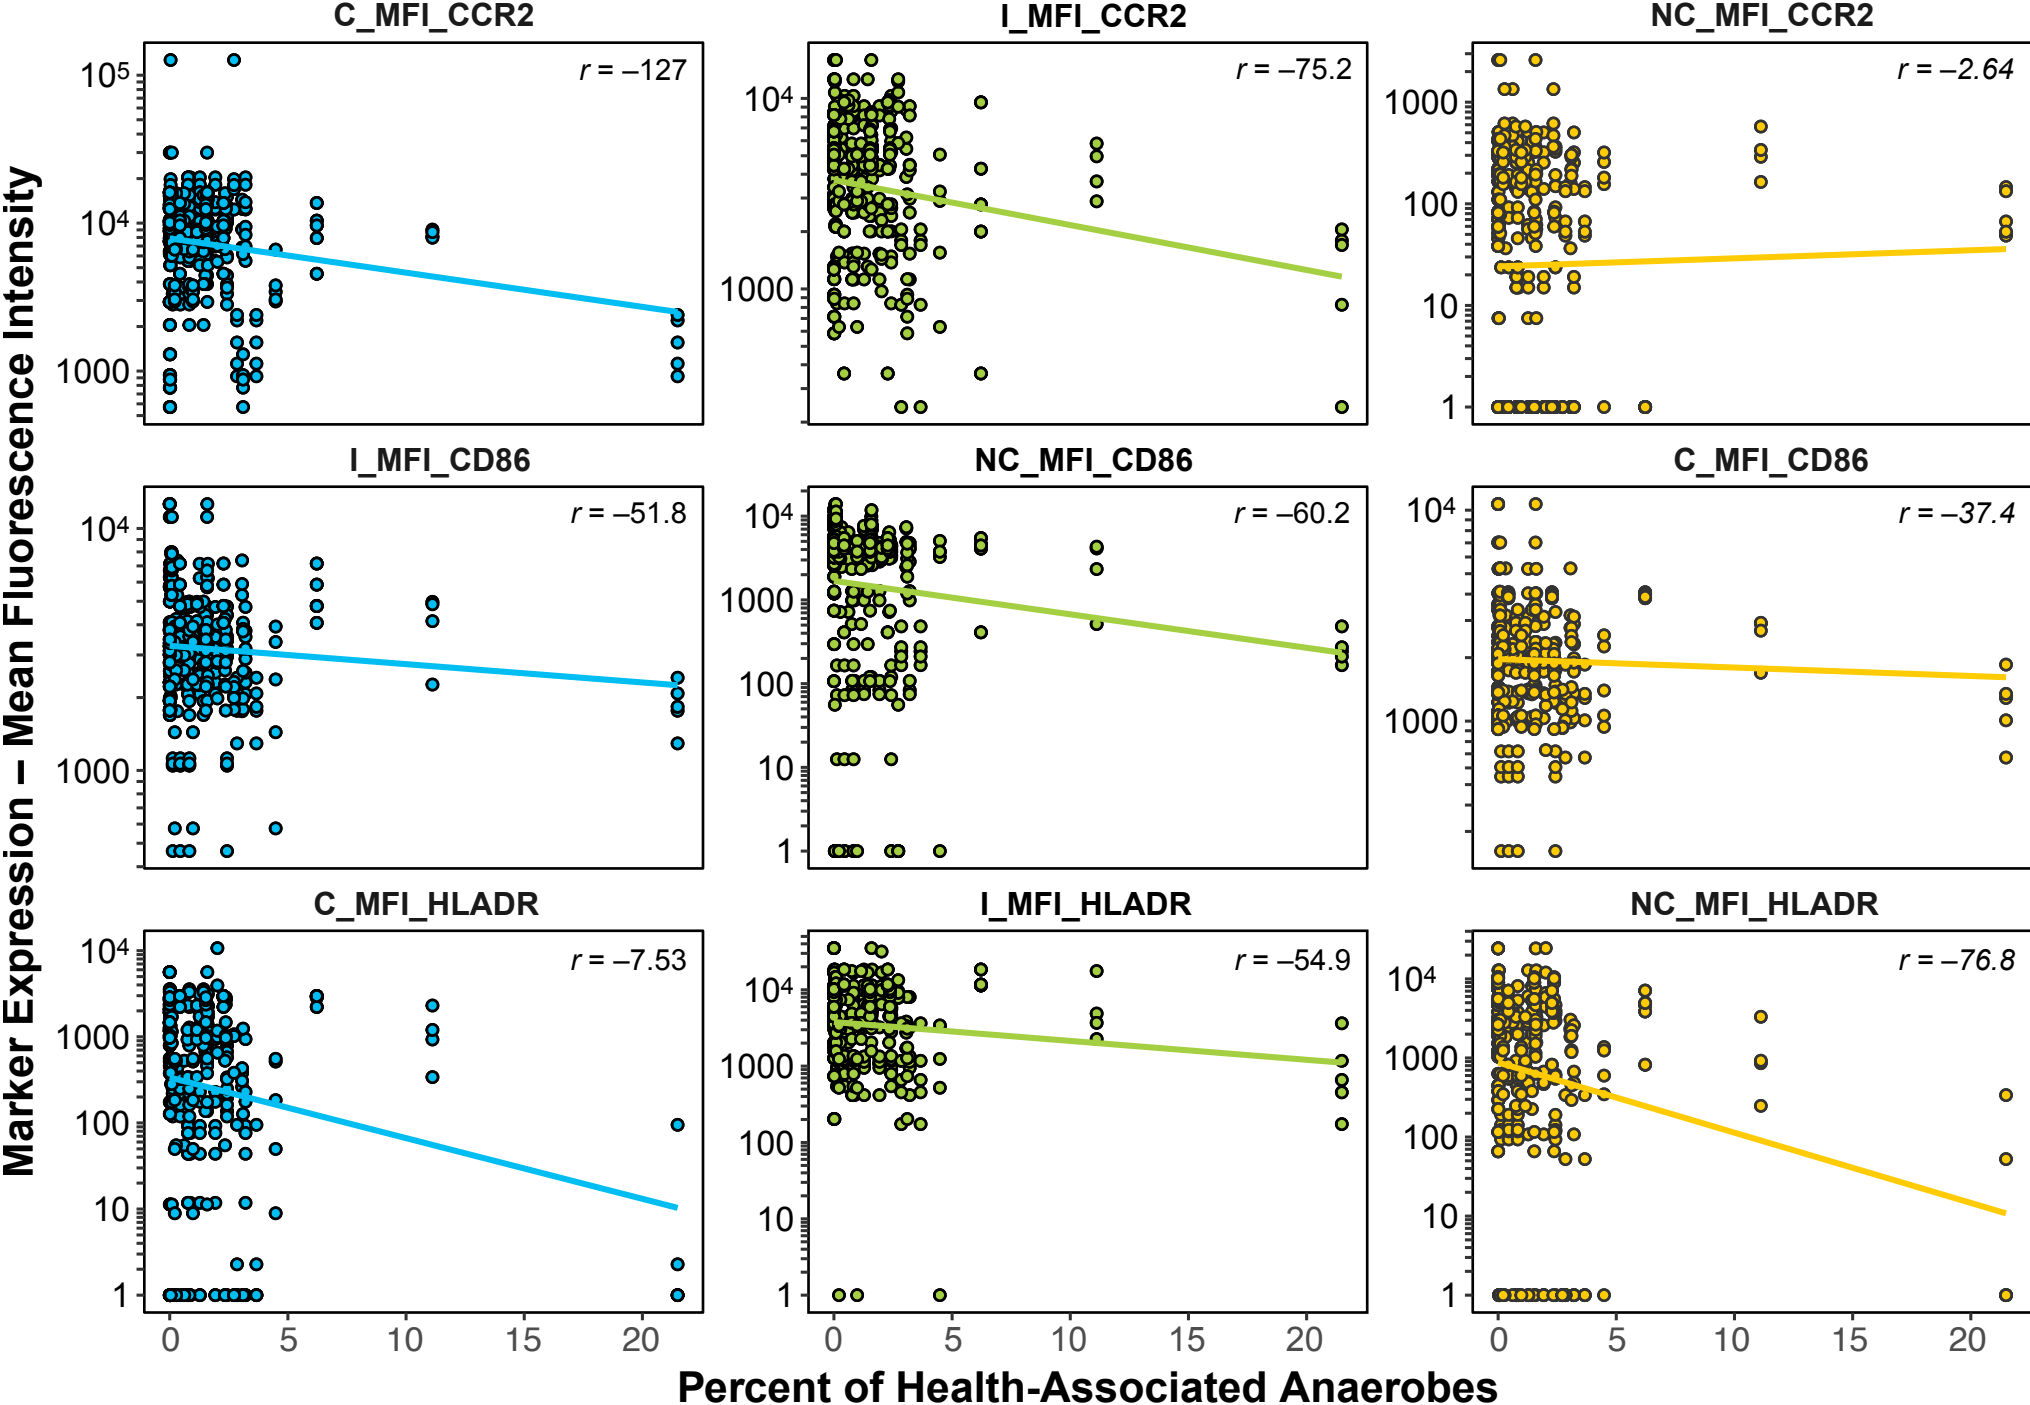

Supplement: CHI-2-4-156-s004.pdf [file CHI-2-4-156-s004.pdf]
